# Supplementary material for: Impact of mAb-FcRn affinity on IgG transcytosis across human well-differentiated airway epithelium
Source: PubMed Central journal article supplement (PMC11439726; doi:10.3389/fimmu.2024.1371156), 2024-09-16
Supplement: DataSheet1.pdf [file DataSheet1.pdf]

## Supplementary Materials

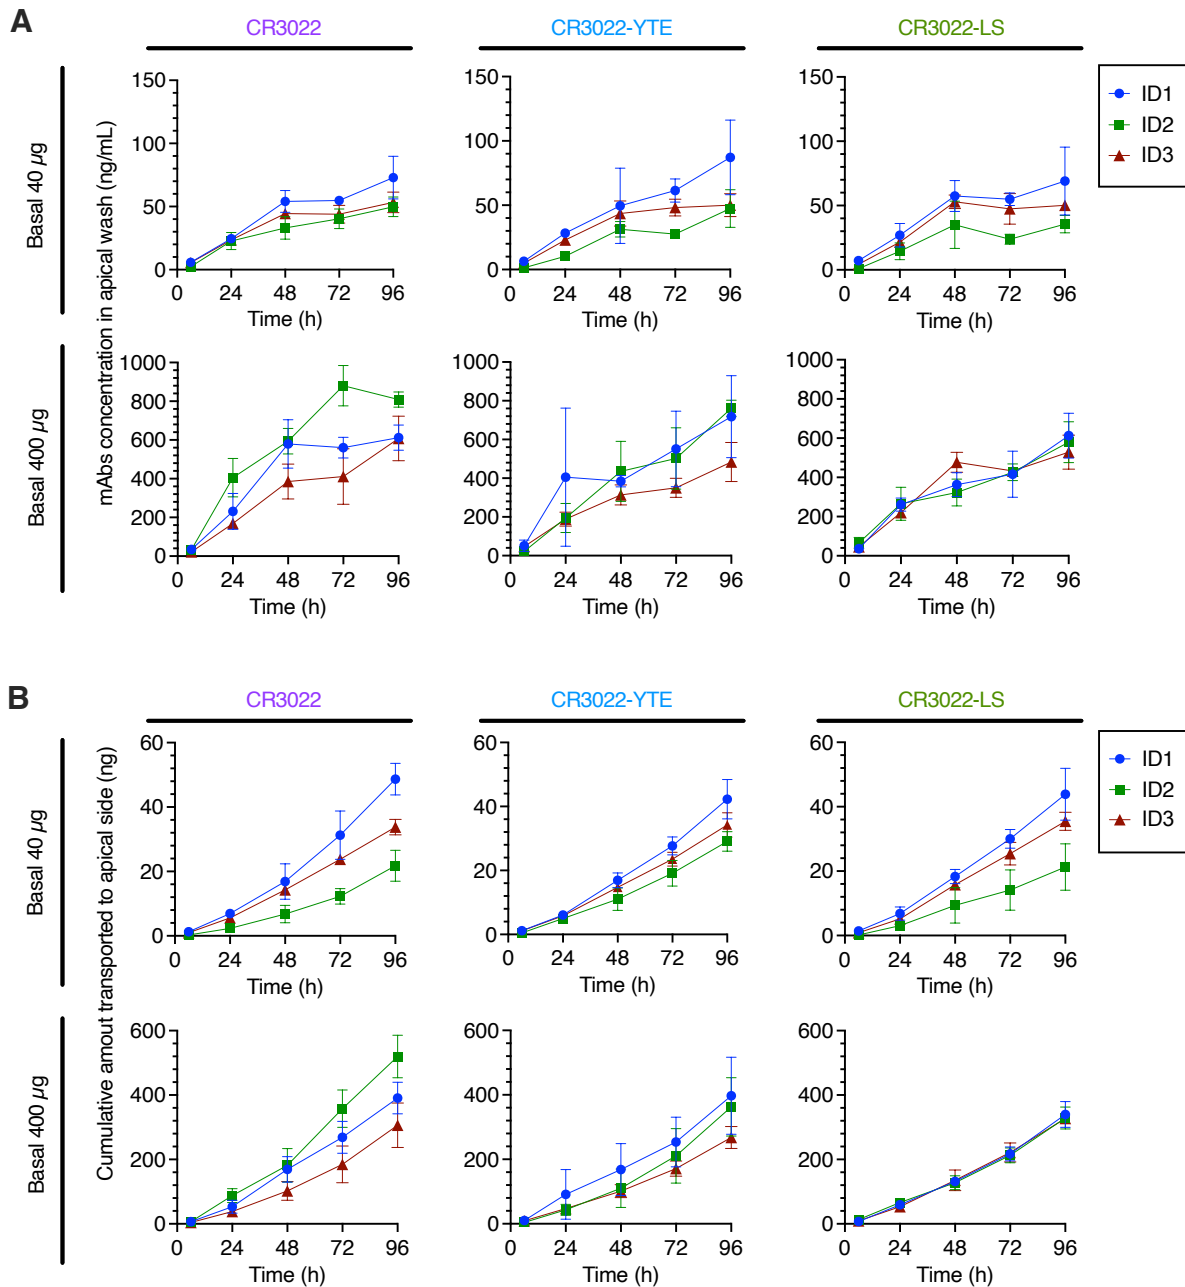

**Figure S1.** Patient ID-based comparison of basal-to-apical transport of CR3022 and its variants across WD-HAE cell culture **(A)** The mAb concentration in the apical wash over time at basal doses of 40 and 400 µg. **(B)** The cumulative amount of mAbs transported to the apical side over time at basal doses of 40 and 400 µg.

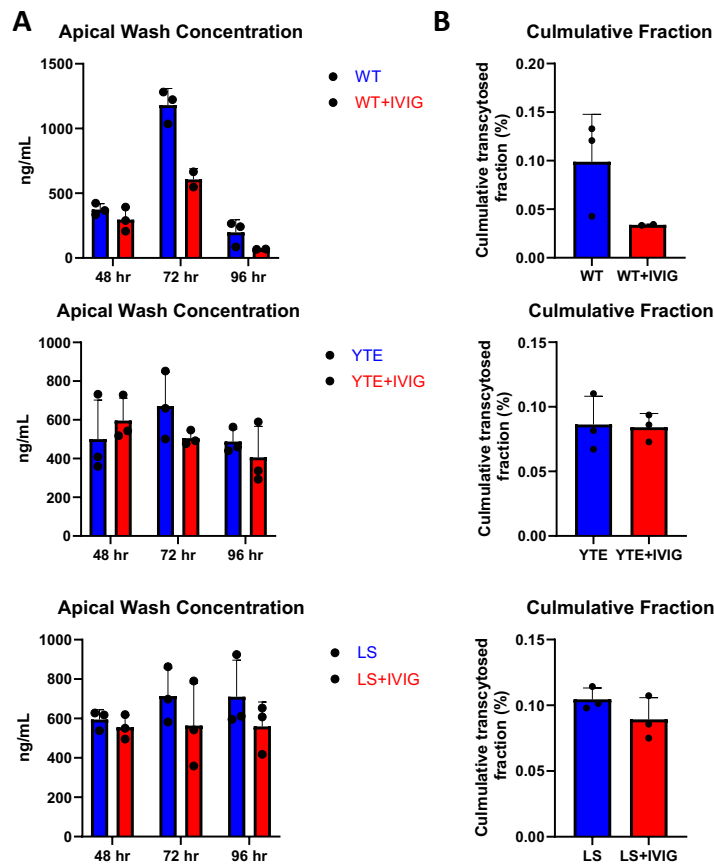

**Figure S2.** Effect of IVIG on the basal-to-apical transport of CR3022, CR3022-YTE and CR3022-LS across WD-HAE cell culture. **(A)** The concentration of various CR3022 variants in the apical wash on Day 2, Day 3 and Day 4 following basal dosing of 400  $\mu\text{g}$ , with or without co-application of IVIG (4 mg). **(B)** The cumulative amount of CR3022 variants transported to the apical side over 4 days, with or without IVIG (4 mg).

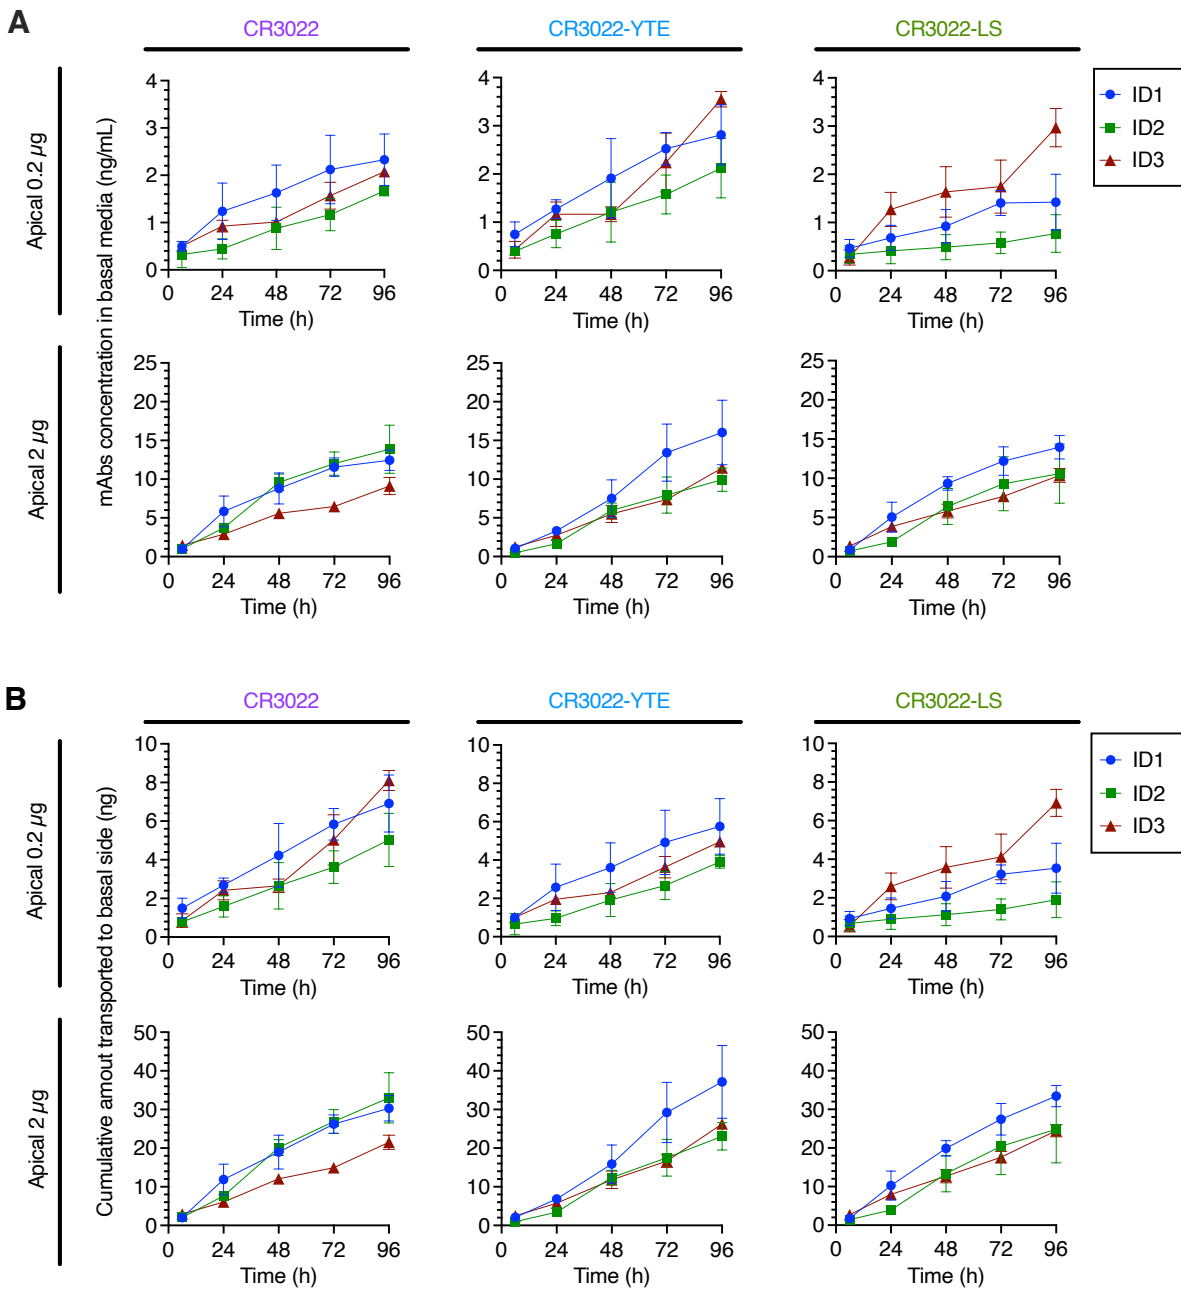

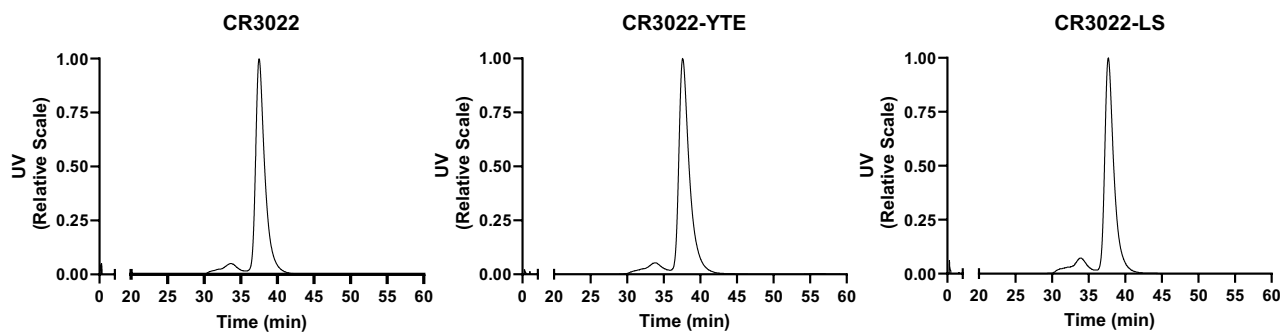

**Figure S4:** Size-exclusion chromatography multi-angle light scattering (SEC/MALS) assessment of purity of CR3022 variants. The % of the UV corresponding to the monomer peak is 91.3, 88.4, and 91.0% for CR3022, CR3022-LS, and CR3022-YTE respectively.

| mAb        | Dose ( $\mu$ g) | Time (h) | <i>P</i> values for mAb concentration in apical wash |              | <i>P</i> values for cumulative amount transported |              |
|------------|-----------------|----------|------------------------------------------------------|--------------|---------------------------------------------------|--------------|
|            |                 |          | vs CR3022-YTE                                        | vs CR3022-LS | vs CR3022-YTE                                     | vs CR3022-LS |
| CR3022     | 20              | 6        | 0.949                                                | 0.944        | 0.951                                             | 0.944        |
|            |                 | 24       | 0.635                                                | 0.719        | 0.704                                             | 0.765        |
|            |                 | 48       | 0.938                                                | 0.794        | 0.759                                             | 0.992        |
|            |                 | 72       | 0.994                                                | 0.790        | 0.957                                             | 0.998        |
|            |                 | 96       | 0.955                                                | 0.748        | 0.996                                             | 0.940        |
| CR3022-YTE | 20              | 6        |                                                      | 1.000        |                                                   | 1.000        |
|            |                 | 24       |                                                      | 0.990        |                                                   | 0.994        |
|            |                 | 48       |                                                      | 0.589        |                                                   | 0.688        |
|            |                 | 72       |                                                      | 0.844        |                                                   | 0.974        |
|            |                 | 96       |                                                      | 0.572        |                                                   | 0.967        |
| CR3022     | 200             | 6        | 0.484                                                | 0.078        | 0.484                                             | 0.078        |
|            |                 | 24       | 0.997                                                | 0.957        | 0.998                                             | 1.000        |
|            |                 | 48       | 0.026*                                               | 0.039*       | 0.518                                             | 0.660        |
|            |                 | 72       | 0.151                                                | 0.051        | 0.165                                             | 0.224        |
|            |                 | 96       | 0.936                                                | 0.260        | 0.275                                             | 0.179        |
| CR3022-YTE | 200             | 6        |                                                      | 0.514        |                                                   | 0.513        |
|            |                 | 24       |                                                      | 0.977        |                                                   | 0.998        |
|            |                 | 48       |                                                      | 0.981        |                                                   | 0.971        |
|            |                 | 72       |                                                      | 0.845        |                                                   | 0.982        |
|            |                 | 96       |                                                      | 0.427        |                                                   | 0.963        |

**Table S1.** Summary statistics of basal-to-apical transport experiments of CR3022 and its variants across WD-HAE cell culture. One-way ANOVA analysis was performed using the data in Figure 2. \* $p < 0.05$ : indicates a statistical significance difference.

| mAb        | Dose ( $\mu$ g) | Time (h) | <i>P</i> values for mAb concentration in basal media |              | <i>P</i> values for cumulative amount transported |              |
|------------|-----------------|----------|------------------------------------------------------|--------------|---------------------------------------------------|--------------|
|            |                 |          | vs CR3022-YTE                                        | vs CR3022-LS | vs CR3022-YTE                                     | vs CR3022-LS |
| CR3022     | 20              | 6        | 0.912                                                | 0.507        | 0.656                                             | 0.659        |
|            |                 | 24       | 0.802                                                | 0.999        | 0.581                                             | 0.895        |
|            |                 | 48       | 0.813                                                | 0.993        | 0.596                                             | 0.823        |
|            |                 | 72       | 0.580                                                | 0.928        | 0.224                                             | 0.417        |
|            |                 | 96       | 0.503                                                | 0.999        | 0.105                                             | 0.659        |
| CR3022-YTE | 20              | 6        |                                                      | 0.292        |                                                   | 0.204        |
|            |                 | 24       |                                                      | 0.825        |                                                   | 0.330        |
|            |                 | 48       |                                                      | 0.871        |                                                   | 0.274        |
|            |                 | 72       |                                                      | 0.369        |                                                   | 0.017*       |
|            |                 | 96       |                                                      | 0.531        |                                                   | 0.016*       |
| CR3022     | 200             | 6        | 0.416                                                | 0.610        | 0.416                                             | 0.610        |
|            |                 | 24       | 0.078                                                | 0.709        | 0.073                                             | 0.694        |
|            |                 | 48       | 0.200                                                | 0.675        | 0.163                                             | 0.650        |
|            |                 | 72       | 0.953                                                | 0.980        | 0.874                                             | 0.959        |
|            |                 | 96       | 0.889                                                | 0.992        | 0.986                                             | 0.975        |
| CR3022-YTE | 200             | 6        |                                                      | 0.942        |                                                   | 0.942        |
|            |                 | 24       |                                                      | 0.316        |                                                   | 0.313        |
|            |                 | 48       |                                                      | 0.632        |                                                   | 0.586        |
|            |                 | 72       |                                                      | 0.994        |                                                   | 0.974        |
|            |                 | 96       |                                                      | 0.830        |                                                   | 0.926        |

**Table S2.** Summary statistics of apical-to-basal transport experiments of CR3022 and its variants across WD-HAE cell culture. One-way ANOVA analysis was performed using the data in Figure 4. \* $p < 0.05$ : indicates a statistical significance difference.
